# Supplementary material
Source: publisher figshare collection journal article supplement (https://frontiersin.figshare.com/ndownloader/files/16787963)
Supplement: Supplementary file 1 [file 16787963]

## Appendices

### Appendix 1 Participant Information

| Interview code <sup>1</sup> | Role                                                                                                                             |
|-----------------------------|----------------------------------------------------------------------------------------------------------------------------------|
| WP2- T1-BCP-01              | Bereavement midwife co-ordinator (former labour ward midwife)                                                                    |
| WP2-T3-BCP-02               | Bereavement specialist midwife                                                                                                   |
| WP2-T6-BCP-03               | Interviewee 1 – Bereavement specialist midwife<br>Interviewee 2 – Bereavement specialist midwife                                 |
| WP2-T7-BCP-04               | Gynaecology sister                                                                                                               |
| WP2-T10-BCP-05              | Interviewee 1 – Section manager of mortuary and bereavement services<br>Interviewee 2 – Bereavement nurse specialist             |
| WP2-T16-BCP-06              | Bereavement specialist midwife                                                                                                   |
| WP2-T17-BCP-07              | Bereavement specialist midwife                                                                                                   |
| WP2-T18-BCP-08              | Bereavement specialist midwife                                                                                                   |
| WP2-T23-BCP-09              | Bereavement support nurse                                                                                                        |
| WP2-T24-BCP-10              | Bereavement specialist midwife                                                                                                   |
| WP2-T26-BCP-11              | Interviewee 1 – Research midwife<br>Interviewee 2 – Antenatal midwife<br>Interviewee 3 – Caseloading midwife                     |
| WP2-T27-BCP-12              | Interviewee 1 – Midwife in birthing unit<br>Interviewee 2 – Midwife in birthing unit<br>Interviewee 3 – Midwife in birthing unit |

WP = work package number

T = transcript number

BCP = bereavement care practitioner

<sup>1</sup> These interview codes are identical to those used on the UK Data Service website  
<https://ukdataservice.ac.uk/>

## The Bereaved

| Type of pregnancy loss | Interview Code <sup>2</sup> | Gender | Age |
|------------------------|-----------------------------|--------|-----|
| FA                     | WP4-T1-FA-1                 | F      | 41  |
| M                      | WP4-T2-M-1                  | F      | 36  |
| M                      | WP4-T3-M-2                  | F      | 34  |
| M                      | WP4-T4-M-3                  | F      | 38  |
| M                      | WP4-T5-M-4                  | F      | 28  |
| M                      | WP4-T6-M-5                  | F      | 32  |
| M                      | WP4-T7-M-6                  | F      | 34  |
| M                      | WP4-T8-M-7                  | F      | 26  |
| M                      | WP4-T9-M-8                  | F      | 35  |
| FA                     | WP4-T10-FA-2                | F      | 34  |
| FA                     | WP4-T11-FA-3                | F      | 26  |
| M                      | WP4-T12-M-9                 | F      | 35  |
| S                      | WP4-T13-S-1                 | F      | 34  |
| FA                     | WP4-T14-FA-4                | F      | 28  |
| FA                     | WP4-T15-FA-5                | F      | 43  |
| S                      | WP4-T16-S-2                 | F      | 33  |
| FA (+M)                | WP4-T17-FA-6                | F      | 35  |
| FA                     | WP4-T18-FA-7                | F      | 32  |
| FA                     | WP4-T19-FA-8                | F      | 37  |
| M                      | WP4-T20-M-10                | F      | 41  |
| FA                     | WP4-T21-FA-9                | F      | 33  |
| FA                     | WP4-T22-FA-10               | F      | 43  |
| S                      | WP4-T23-S-3                 | F      | 34  |
| M                      | WP4-T24-M-11                | F      | 31  |
| S                      | WP4-T25-S4                  | F      | 37  |
| S                      | WP4-T26-S-5                 | F      | 43  |
| S                      | WP4-T27-S6                  | F      | 39  |
| S                      | WP4-T28-S-7                 | F      | 32  |
| S                      | WP4-T29-S-8                 | F      | 34  |
| S                      | WP4-T30-S-9                 | F      | 40  |

<sup>2</sup> These interview codes are identical to those used on the UK Data Service website  
<https://ukdataservice.ac.uk/>

|      |               |   |           |
|------|---------------|---|-----------|
| FA   | WP4-T31-FA-11 | F | Not given |
| FA/S | WP4-T32-FA-P1 | M | 45        |
| S    | WP4-T33-S-P2  | M | 42        |
| S    | WP4-T34-S-P3  | M | 34        |
| S    | WP4-T35-S-F4  | F | 42        |

WP = work package number

T = transcript number

FA = termination following diagnosis of foetal anomaly

S = stillbirth

M = miscarriage

## Appendix 2

## Full list of metaphor categories identified in the dataset

| Rank | Metaphor category      | Example                                                                                                                                                                             | No. of instances (out of a total of 2691 annotated instances) |
|------|------------------------|-------------------------------------------------------------------------------------------------------------------------------------------------------------------------------------|---------------------------------------------------------------|
| 1.   | Reification            | Be as kind to yourself as you can <u>giving yourself time and space</u> <sup>3</sup>                                                                                                | 839                                                           |
| 2.   | Moving through space   | it feels impossible to <u>shift and move forward</u> and imagine that they'll ever <u>get beyond</u> this moment                                                                    | 673                                                           |
| 3.   | Journey                | people will I suppose <u>move forward</u> on it in a way that I s'pose is congruent with their conceptualisation of their experience<br><br>I'm <u>veering one way or the other</u> | 461                                                           |
| 4.   | Physical location      | they don't quite grasp <u>where a bereaved person is</u><br><br>it's meeting parents <u>where they are in their grief</u> as well                                                   | 397                                                           |
| 5.   | Body-related metaphors | what is your <u>gut feeling</u> , what's your, what's your <u>heart saying</u> , are you gonna remain <u>broken</u> forever like this                                               | 207                                                           |
| 6.   | Animacy                | my back totally <u>gave up</u>                                                                                                                                                      | 194                                                           |
| 7.   | Container              | when you're grieving you can sort of <u>enter sort of a grief world</u> where you start to push, push people away                                                                   | 177                                                           |
| 8.   | Divided self           | <u>My brain</u> was obviously still in shock mode<br><br>I tend to go off on tangents and <u>lose where I am myself</u>                                                             | 141                                                           |
| 9.   | Seeing                 | sort of be there, available to them with u- utter kindness, patience, tolerance, understanding, non-assumptive presence and just <u>witness</u> their struggle                      | 127                                                           |
| 10.  | Agency, lack of agency | <u>it's like a rollercoaster</u> that's, like, throughout the day, throughout weeks,                                                                                                | 106                                                           |

<sup>3</sup> In this paper, relevant metaphorical phrases in each example are underlined. It should be noted that not all metaphors in each example are identified or discussed. This is not restricted to the level of the word; words from the surrounding context may be included for clarity where this is necessary for understanding of the metaphor.

|     |                                                     |                                                                                                                                               |     |
|-----|-----------------------------------------------------|-----------------------------------------------------------------------------------------------------------------------------------------------|-----|
|     |                                                     | days, weeks, like that - sometimes in an hour in those first, you know, months                                                                |     |
| 11. | Being moved, acted upon                             | <u>It's made me think</u> a lot more about myself<br><br>It just <u>knocked me</u> again                                                      | 106 |
| 12. | Crumbling, breaking, falling apart, fixing, mending | He totally <u>fell apart</u><br><br>Your heart <u>breaks</u> a bit                                                                            | 93  |
| 13. | Fighting or Battling or Struggling                  | You need to <u>stand your ground</u> and you need to <u>fight</u><br><br>You kind of think that's it, you've <u>won</u>                       | 86  |
| 14. | Physical sensation and pain                         | It causes me so much <u>pain</u> to know that that's what happened<br><br>Now I was <u>numb</u> to it                                         | 83  |
| 15. | Presence and absence                                | It will always <u>be with me</u><br><br>That really <u>stuck with him</u>                                                                     | 82  |
| 16. | Opening and closing                                 | I'm quite <u>open</u><br><br>I guess it was just a way of <u>closing things off</u>                                                           | 77  |
| 17. | Up and Down                                         | That was probably one of the <u>lowest</u> points                                                                                             | 72  |
| 18. | Movement                                            | having to <u>go through</u> that knowing your baby is is dead<br><br>you've sort've <u>pushed back</u>                                        | 72  |
| 19. | Violence and impact                                 | you're sort of being <u>bombarded</u> with phrases<br><br>if it was my first pregnancy I really think it would have <u>hit us</u> both harder | 71  |
| 20. | Nature                                              | before she was an absolute <u>rock</u><br><br>you know you've got to try and step into their shoes and see it from their eyes you             | 64  |

|     |                        |                                                                                                                                                                                                         |    |
|-----|------------------------|---------------------------------------------------------------------------------------------------------------------------------------------------------------------------------------------------------|----|
|     |                        | know what are they seeing what's their <u>world</u> what's their <u>landscape</u>                                                                                                                       |    |
| 21. | Space                  | was quite nice, just to kind of um, be able to have the <u>space</u> to process really after that<br><br>are you gonna have another one to fill the <u>void</u>                                         | 57 |
| 22. | Ties and bonds         | I can only call it a procedure cause I think I've <u>detached</u> myself<br><br>I'd had time to get <u>attached</u>                                                                                     | 55 |
| 23. | Machine                | your brain <u>shuts down</u><br><br>I'm taken upstairs to what I can only describe as a <u>conveyor belt</u>                                                                                            | 53 |
| 24. | Obstacles              | just felt like he had to suddenly just <u>get over it</u><br><br>I couldn't get my head <u>round it</u>                                                                                                 | 52 |
| 25. | Order and disorder     | I agreed to the natural birth I was tired I was hungry I was really emotional I was just <u>in a mess</u><br><br>at the time I just wasn't <u>thinking straight</u>                                     | 51 |
| 26. | Stages                 | it was like we <u>passed that milestone</u><br><br>sort of <u>plot</u> the <u>next steps</u> forward                                                                                                    | 46 |
| 27. | Liquid-based metaphors | the safest place for him was on the ward getting on with stuff and <u>bottling things up</u><br><br>I got to the point where the emotions just had to <u>spill out</u>                                  | 46 |
| 28. | Closeness and distance | I've lost friends that have that have <u>distanced themselves</u> um because they don't know how to act with me<br><br>but I feel just that I need to <u>keep them away</u> from this just a little bit | 45 |

|     |                                                           |                                                                                                                                                                                                                                                                               |    |
|-----|-----------------------------------------------------------|-------------------------------------------------------------------------------------------------------------------------------------------------------------------------------------------------------------------------------------------------------------------------------|----|
| 29. | Process                                                   | <p>it was nice to sort've <u>round it off</u> I guess but beyond that I don't know what they could offer me</p> <p>I knew we would come through it at <u>the other end</u> i never once thought i don't think I'm gonna get out of this</p>                                   | 44 |
| 30. | Darkness and light                                        | <p>reading through it you can see actually I was in quite a <u>dark place</u> there</p> <p>I've seen some genuine kindness from people. and you know you're thinking at this there are there've been some <u>bright moments</u></p>                                           | 43 |
| 31. | Carrying                                                  | <p>I think I'd just got all the stuff going around in my head that I just needed to say out loud, <u>offload</u> to someone</p> <p>talked through options and kinda gave you lots of things to take away knowing that it might be too much for me to <u>take on board</u></p> | 41 |
| 32. | Not feeling part of the world, having different realities | <p>you come out of hospital and the world is still carrying on but your <u>world has stopped</u></p> <p>just it's not a nice <u>world to be in</u>. at all</p>                                                                                                                | 40 |
| 33. | Moving time                                               | <p>I knew that this awful <u>moment was coming</u> and I was just avoiding it</p> <p>I find it quite difficult now that the <u>time's moved on</u></p>                                                                                                                        | 30 |
| 34. | Sense of touch                                            | <p>I think we're all just <u>feeling our way</u> through really</p> <p>you know I'm <u>touched by grief</u> in a way that I I'd never lost anyone really before</p>                                                                                                           | 28 |
| 35. | Letting go physically, holding on                         | <p>We were going to scatter his ashes on his due date but I don't feel ready to <u>let him go</u></p> <p>started talking about it she'd <u>held onto</u> that grief for fifty years</p>                                                                                       | 28 |

|     |                           |                                                                                                                                                                                                                                                                                                                                                    |    |
|-----|---------------------------|----------------------------------------------------------------------------------------------------------------------------------------------------------------------------------------------------------------------------------------------------------------------------------------------------------------------------------------------------|----|
| 36. | Project                   | <p>yeah life isn't perfect and life hasn't <u>gone to plan</u></p> <p>successfully battled infertility and that's the <u>job done</u></p>                                                                                                                                                                                                          | 26 |
| 37. | Conduit Metaphor          | <p>hopefully that will get the <u>message across</u> because you know someone says asks you how are you you're like oh god I don't know where to begin</p> <p>yeah that's it's just trying to kind've <u>get that across</u></p>                                                                                                                   | 26 |
| 38. | Silence and Noise         | <p>We had a couple of friends two of our closest friends or very close friends um <u>radio silence</u> for three? Four weeks? Cause they thought we needed space. We thought they were ignoring us</p> <p>it was you know you get <u>echoes</u> of the first birth and the first pregnancy as well. That was quite traumatic um for both of us</p> | 26 |
| 39. | Straight and not straight | <p>at the time I just wasn't <u>thinking straight</u>. Everything was such a mess you don't really take in what people're saying properly</p> <p>so it kind of <u>spiralled</u> from there</p>                                                                                                                                                     | 26 |
| 40. | Pressure                  | <p>I felt so much <u>pressure</u> from them which I shouldn't feel</p> <p>was like trying to <u>force me</u> to do it cause they was thinking I will regret it but I knew what is the best for me in that moment</p>                                                                                                                               | 24 |
| 41. | Physical strength         | <p>you're meant to be this kind of <u>strong kind of pillar</u> and something like this it can knock you down so easily</p> <p>when I'd finally <u>built up the strength</u> to kind of talk to her about what had happened</p>                                                                                                                    | 23 |
| 42. | Fairness, justice         | <p>I've thought actually why should I be the one that's <u>spared</u>?</p>                                                                                                                                                                                                                                                                         | 22 |



|     |                      |                                                                                                                                                                                                                           |    |
|-----|----------------------|---------------------------------------------------------------------------------------------------------------------------------------------------------------------------------------------------------------------------|----|
|     |                      | it was just a <u>blessing</u> a real blessing                                                                                                                                                                             |    |
| 43. | Pushing and pulling  | you were having to <u>push</u> and battle with the system to get the process started<br><br>would have to deliver the baby and didn't know if the baby would <u>pull through</u>                                          | 21 |
| 44. | Hiding               | They weren't telling me the whole truth they were <u>hiding behind things</u><br><br>Try not to do the thing that we always do which is try and <u>hide grief</u> and try and recognise um that that baby as a real child | 21 |
| 45. | Size                 | for me the <u>big thing</u> was the fear of the future<br><br>life keeps moving on but there's this <u>big chunk of our life</u> which is missing                                                                         | 20 |
| 46. | Games, chance, sport | this just seems really pointless doesn't it because all the <u>odds are stacked</u> against me here<br><br>obviously I knew at one point it was gonna be <u>game over</u> and that really upset me                        | 18 |
| 47. | Levels               | we're very fortunate that we've got those friends so we've got <u>another layer</u> of understanding<br><br>this hurts and this affects us on a very <u>deep level</u>                                                    | 17 |
| 48. | Going back and forth | didn't know if <u>I was coming or going</u><br><br>oh no I think I've <u>gone back</u> too soon I thought I was okay I wanted to get back some normality                                                                  | 17 |
| 49. | Depth                | you're hoping for an answer that they can't give you. And you know that <u>deep in your heart</u><br><br>Because you've still got to go into <u>depth</u> <u>all of your feelings</u> and emotions and I                  | 17 |

|     |                             |                                                                                                                                                                                                                                                        |    |
|-----|-----------------------------|--------------------------------------------------------------------------------------------------------------------------------------------------------------------------------------------------------------------------------------------------------|----|
|     |                             | think with miscarriage you don't know what they are for a while                                                                                                                                                                                        |    |
| 50. | Searching and finding       | <p>sometimes you can't <u>find the words</u></p> <p>when you've got through three years of not seeing a positive pregnancy test you don't really have any hope left it's all gone so I'd managed to <u>find this sort've little window of hope</u></p> | 16 |
| 51. | Guiding, leading, following | <p>someone could help you with the decision. and <u>steer you</u> with it a bit</p> <p>screening can then <u>lead</u> to making really difficult decisions</p>                                                                                         | 15 |
| 52. | Balance                     | <p>I had no idea it was going to make me mentally quite so <u>unstable</u> for quite so long</p> <p>the morning of it though I had a bit of a <u>wobble</u> in the sense that I hadn't named her</p>                                                   | 15 |
| 53. | Visibility and invisibility | <p>really want to die in that moment in that room cause everything what I was waiting for just <u>vanished</u></p> <p>All those hopes and dreams overnight suddenly just <u>vanished</u> and that's what I struggled with</p>                          | 14 |
| 54. | Speed                       | <p>I can't really remember it almost it was all a <u>bit of a blur</u></p> <p>understand what <u>pace</u> they want things to happen at</p>                                                                                                            | 14 |
| 55. | Exploring                   | <p>we both just burst into tears I just ended up going to the GP saying look we don't need to <u>explore</u> this fertility thing any more</p> <p>I never <u>explored</u> those options</p>                                                            | 14 |
| 56. | Weight                      | <p>I guess I don't know how to explain the emotions really <u>crushing</u> I suppose</p> <p>it wasn't something we took <u>lightly</u> by any means</p>                                                                                                | 13 |

|     |                                              |                                                                                                                                                                                                                                                        |    |
|-----|----------------------------------------------|--------------------------------------------------------------------------------------------------------------------------------------------------------------------------------------------------------------------------------------------------------|----|
| 57. | Temperature                                  | <p><u>quite cold</u> I didn't feel there was any kind of empathy</p> <p>I don't want that to <u>sound kind of cold</u> or heartless of anything whatever works for everyone is fine but for me it was remembering that that I had said my goodbyes</p> | 13 |
| 58. | Finding and losing things                    | <p>you're excited about the future and you make plans and once that's <u>lost</u> the first time that never ever comes back again</p> <p>feel part of me is <u>missing</u></p>                                                                         | 13 |
| 59. | Life and Death                               | <p><u>that kills me</u> cos I I cannot imagine kind of erm carrying on you know with with my life as it is</p> <p>I'm just doing what I'm doing to <u>survive</u> really</p>                                                                           | 12 |
| 60. | Tangling and untangling                      | <p>Try and <u>untangle</u> that all from yeah the trauma of what happened to me</p> <p>the other um lady I saw was just very good at helping me <u>unpick</u> how I felt about a lot of these</p>                                                      | 12 |
| 61. | Cleanliness, dirtiness                       | <p>had a massage and a facial felt like I was cleansing and <u>purifying myself</u></p> <p>I wanted a <u>fresh start</u></p>                                                                                                                           | 9  |
| 62. | Changing, adjusting, developing and evolving | <p>you have to try and <u>rebuild yourself</u> and your confidence and everything</p> <p>as we've been going along <u>you evolve</u></p>                                                                                                               | 9  |
| 63. | Safety, protection, danger                   | <p>I just like to be at home and prefer the quiet life so home's been <u>my sanctuary</u></p> <p>for us it felt as if that was <u>enough security</u> um it was like we we passed that milestone of twelve weeks and everything was gonna be fine</p>  | 8  |
| 64. | Circular motion                              | <p>an <u>impossible circle</u> trying to find out information</p>                                                                                                                                                                                      | 6  |

|     |                             |                                                                                                                                                                                                                                                                                                                                      |   |
|-----|-----------------------------|--------------------------------------------------------------------------------------------------------------------------------------------------------------------------------------------------------------------------------------------------------------------------------------------------------------------------------------|---|
|     |                             | she apologised for the wording in the letter and you <u>just go round in circles</u> you know                                                                                                                                                                                                                                        |   |
| 65. | Medical cure                | the baby is <u>kind of the antidote</u> to the misery really<br><br><u>it's a plaster</u> it's not gonna solve the problem                                                                                                                                                                                                           | 6 |
| 66. | Transparency and opaqueness | During the first session we make all the <u>boundaries clear</u><br><br>well once a <u>test comes back clear</u> it's fine                                                                                                                                                                                                           | 5 |
| 67. | Physical injury             | some kind've like <u>healing moment</u> I don't really know what happened but they were obviously all in this room with this dead baby and um [NAME] was really proud that it was her son<br><br>I don't feel the need to keep <u>opening that wound again</u> and again for me what's important is that we heal and we move forward | 3 |

### Appendix 3                      Topics identified in the data and the number of times metaphor was used to talk about each of these topics

These topics were identified in interviews with women who had experienced pregnancy loss, their partners, and those who support them.

| Topics                             | Number of times metaphor was used to talk about each of these topics |
|------------------------------------|----------------------------------------------------------------------|
| Advice                             | 22                                                                   |
| Anger                              | 24                                                                   |
| Asking for support                 | 10                                                                   |
| Attitudes towards others           | 15                                                                   |
| Awareness, self-awareness          | 21                                                                   |
| Baby and absence of baby           | 129                                                                  |
| Becoming a different person        | 64                                                                   |
| Becoming a supporter               | 4                                                                    |
| Becoming pregnant                  | 36                                                                   |
| Becoming pregnant again            | 87                                                                   |
| Behaviour in support group meeting | 18                                                                   |

|                                                                             |     |
|-----------------------------------------------------------------------------|-----|
| Being reminded of the loss                                                  | 31  |
| Communication                                                               | 346 |
| Community-forming - not alone                                               | 75  |
| Continued existence of baby (treating the baby as if s/he were still alive) | 116 |
| Dads                                                                        | 101 |
| Dealing and not dealing with the loss                                       | 349 |
| Decision-making about pregnancy                                             | 127 |
| Diagnosis                                                                   | 88  |
| Disenfranchised grief - not given permission to grieve                      | 11  |
| Distinction between miscarriage and stillbirth                              | 5   |
| Emotional effects - other, general                                          | 404 |
| Ensuring that something good came out of it                                 | 29  |
| Existence of baby                                                           | 92  |
| Failure and guilt                                                           | 33  |
| Family, partners, relationships                                             | 152 |
| Fear, anxiety                                                               | 31  |
| Feelings of 'going crazy'                                                   | 12  |
| Funeral and or cremation                                                    | 20  |
| Grief, sadness and upset                                                    | 178 |
| Helping others                                                              | 23  |
| Hopes and expectations                                                      | 15  |
| Images, symbols                                                             | 88  |
| Isolation                                                                   | 25  |
| Judgement                                                                   | 8   |
| Labour, birth                                                               | 75  |
| Lack of care, insufficient care                                             | 53  |
| Lack of choice, options, control                                            | 21  |
| Lack of information                                                         | 39  |
| Language and terminology                                                    | 86  |
| Law                                                                         | 7   |
| Loss of future                                                              | 43  |
| Making choices                                                              | 124 |
| Marking time & dates                                                        | 25  |
| Meaning-making                                                              | 18  |
| Medical care unmarked                                                       | 186 |
| Medical support organisations                                               | 3   |
| Memory-making                                                               | 254 |
| Miscarriage                                                                 | 60  |
| Mother's body, intuition about                                              | 67  |
| Nonsensical ideas, ideas accepted to be illogical                           | 8   |
| Normality                                                                   | 23  |
| Not knowing                                                                 | 22  |
| Parenthood                                                                  | 17  |
| Pregnancy (unmarked)                                                        | 114 |

|                                                  |     |
|--------------------------------------------------|-----|
| Pregnancy loss (unmarked)                        | 366 |
| Reactions of others                              | 204 |
| Recovery, improvement and acceptance             | 142 |
| Remains and decisions about remains              | 113 |
| Rites and rituals                                | 139 |
| Shared understanding (or lack of)                | 24  |
| Siblings                                         | 42  |
| Support (general)                                | 239 |
| Support Organisation or Group                    | 82  |
| Methods of support offered                       | 17  |
| Taboo or silence in society                      | 66  |
| Talking about it - the bereaved                  | 218 |
| Termination                                      | 129 |
| Types of loss                                    | 29  |
| Unexpectedness                                   | 7   |
| Validation, loyalty to baby's memory, and legacy | 122 |
